# Supplementary material
Source: Springer Nature journal article supplement (https://www.springermedizin.de/resource/supplementary/12943_2014_1285_MOESM8_ESM.pdf/9553146)
Supplement: MOESM8 [file 9553146]

Additional file 8

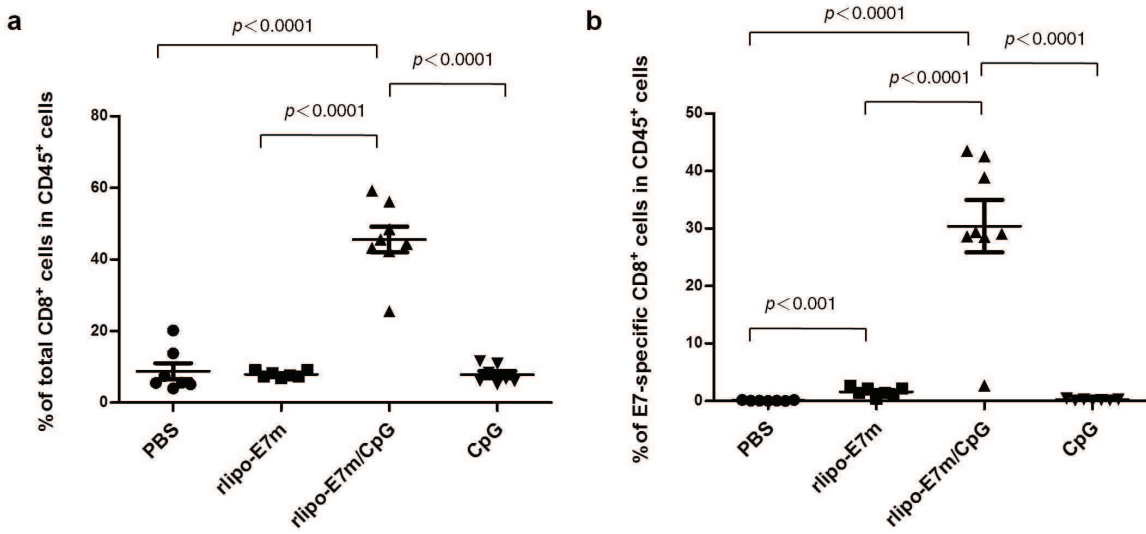

**Figure S8: rIipo-E7m immunization leads to increased numbers of tumor-infiltrating antigen-specific CD8+ T cells in the presence of CpG ODN.** Tumor-bearing mice ( $n=6$  per group) were immunized with rIipo-E7m (10  $\mu\text{g}/\text{mouse}$ ), rIipo-E7m (10  $\mu\text{g}/\text{mouse}$ ) + CpG (10  $\mu\text{g}/\text{mouse}$ ) or PBS as a control at 14 days post-tumor cell implantation. The tumors removed from tumor-bearing mice at 24 days post-tumor implantation were minced and crushed through a 70- $\mu\text{m}$  filter, and the total cells were stained with antibodies against the indicated markers; 50,000 events were acquired for each sample. The data represent the percentages of (a) total CD8+ cells and (b) E7-specific CD8+ cells among tumor-infiltrating CD45+ cells. Significant differences are indicated by the  $P$  values in the graph.
